# Supplementary material
Source: Springer Nature journal article supplement (https://www.springermedizin.de/resource/supplementary/12874_2010_549_MOESM4_ESM.pdf/9432448)

Exposed to statins

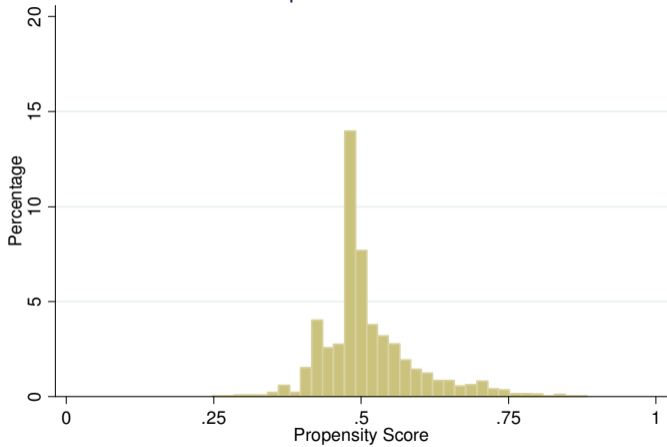

Unexposed to statins

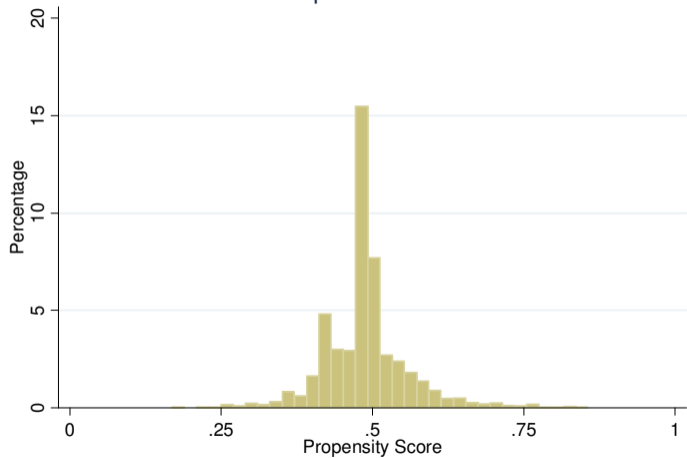

Supplement: MOESM4 [file 9432448]
